# Supplementary material for: Secreted Protein Acidic and Rich in Cysteine (Sparc) KO Leads to an Accelerated Ageing Phenotype Which Is Improved by Exercise Whereas SPARC Overexpression Mimics Exercise Effects in Mice
Source: MDPI journal article supplement (doi:10.3390/metabo12020125), 2022-01-28
Supplement: s1 [file s1]

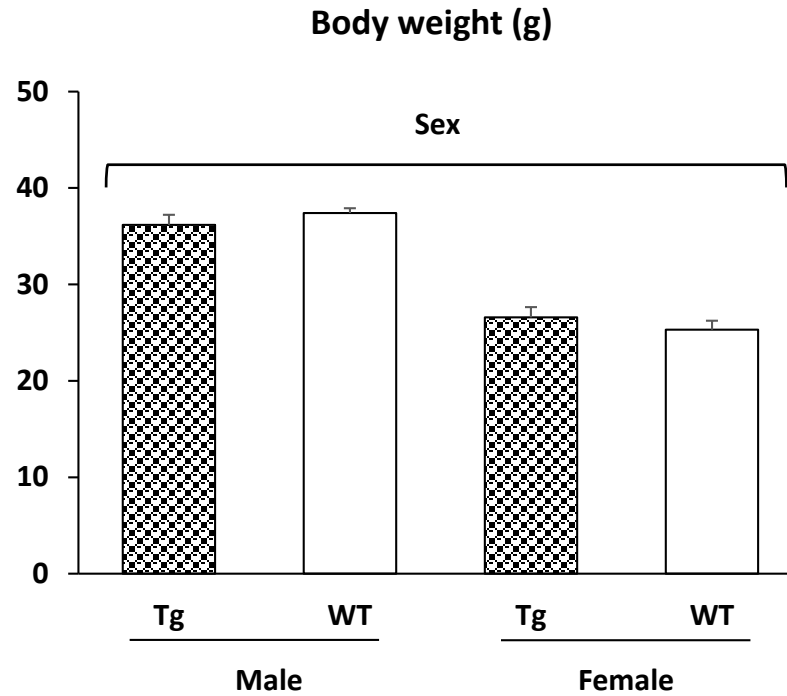

**Figure S 1:** Body weights of both WT and Tg mice (male and female).

Male mice had a higher body weight than female mice.

All data are mean  $\pm$  SEM. The number of mice: 5-11 mice per experimental condition.

Abbreviations: g, gram; *Sparc*, secreted protein acidic and rich in cysteine; Tg, transgenic (*Sparc* overexpression); WT, wild-type.
